# Supplementary material for: Sensitivity analyses of OH missing sinks over Tokyo metropolitan area in the summer of 2007
Source: Copernicus journal article supplement (doi:10.5194/acp-9-8975-2009), 2009-11-27
Supplement: Supplementary file 1 [file acp-9-8975-2009-supplement.pdf]

## Supplementary material for:

### Sensitivity analyses of OH missing sinks over Tokyo metropolitan area in the summer of 2007

**Satoru Chatani<sup>1\*</sup>, Nobuo Shimo<sup>1</sup>, Sou Matsunaga<sup>1</sup>, Yoshizumi Kajii<sup>2</sup>, Shungo Kato<sup>2</sup>, Yoshihiro Nakashima<sup>2</sup>, Koji Miyazaki<sup>2</sup>, Koichiro Ishii<sup>3</sup> and Hiroyuki Ueno<sup>3</sup>**

[1]{Japan Petroleum Energy Center, Tokyo, Japan}

[2]{Tokyo Metropolitan University, Tokyo, Japan}

[3]{Tokyo Metropolitan Research Institute for Environmental Protection, Tokyo, Japan}

[\*]{Contracted researcher from Toyota Central R&D Labs., Inc., Aichi, Japan}

Correspondence to: Satoru Chatani (schatani@mosk.tytlabs.co.jp)

Results and discussions of sensitivity analyses are described in Section 5 of the main text. Fig.10 shows incremental ratios of concentrations of NO<sub>2</sub>, O<sub>3</sub>, OH and secondary aerosol components in the chg-RCHO, chg-DCB1 and chg-PROD2 cases compared to those in the base case, which are averaged over the target period. Fig.13 shows incremental ratios of concentrations of NO<sub>2</sub>, O<sub>3</sub>, OH and secondary aerosol components in the chg-ALK5, chg-OLE2 and chg-ARO2 cases compared to those in the base case, which are averaged over the target period. Only selected species are included in these figures. Incremental ratios of concentrations of other remaining species in the chg-RCHO, chg-DCB1 and chg-PROD2 cases are shown in Fig.S1, and those in the chg-ALK5, chg-OLE2 and chg-ARO2 cases are shown in Fig.S2 in this Supplementary material. Abbreviations of species names which appear in Fig.S1 and Fig.S2 are shown in Table S1.

Table S1 Abbreviations of species names which appear in Fig. S1 and S2.

| Name    | Description                                                                                                                                                      |
|---------|------------------------------------------------------------------------------------------------------------------------------------------------------------------|
| NO      | Nitric Oxide                                                                                                                                                     |
| O3P     | Ground State Oxygen Atoms                                                                                                                                        |
| NO3     | Nitrate Radical                                                                                                                                                  |
| N2O5    | Nitrogen Pentoxide                                                                                                                                               |
| HNO3    | Nitric Acid                                                                                                                                                      |
| O1D2    | Excited Oxygen Atoms                                                                                                                                             |
| HONO    | Nitrous Acid                                                                                                                                                     |
| HO2     | Hydroperoxide Radicals                                                                                                                                           |
| CO      | Carbon Monoxide                                                                                                                                                  |
| HNO4    | Peroxynitric Acid                                                                                                                                                |
| HO2H    | Hydrogen Peroxide                                                                                                                                                |
| SO2     | Sulfur Dioxide                                                                                                                                                   |
| SULF    | Sulfates                                                                                                                                                         |
| C_O2    | Methyl Peroxy Radicals                                                                                                                                           |
| HCHO    | Formaldehyde                                                                                                                                                     |
| COOH    | Methyl Hydroperoxide                                                                                                                                             |
| MEOH    | Methanol                                                                                                                                                         |
| RO2_R   | Peroxy Radical Operator representing NO to NO2 conversion with HO2 formation                                                                                     |
| ROOH    | Lumped higher organic hydroperoxides                                                                                                                             |
| R2O2    | Peroxy Radical Operator representing NO to NO2 conversion without HO2 formation                                                                                  |
| RO2_N   | Peroxy Radical Operator representing NO consumption with organic nitrate formation                                                                               |
| RNO3    | Lumped Organic Nitrates                                                                                                                                          |
| MEK     | Ketones and other non-aldehyde oxygenated products which react with OH radicals slower than $5 \times 10^{-12} \text{ cm}^3 \text{ molec}^{-2} \text{ sec}^{-1}$ |
| PROD2   | Ketones and other non-aldehyde oxygenated products which react with OH radicals faster than $5 \times 10^{-12} \text{ cm}^3 \text{ molec}^{-2} \text{ sec}^{-1}$ |
| CCO_O2  | Acetyl Peroxy Radicals                                                                                                                                           |
| PAN     | Peroxy Acetyl Nitrate                                                                                                                                            |
| CCO_OOH | Peroxy Acetic Acid                                                                                                                                               |
| CCO_OH  | Acetic Acid                                                                                                                                                      |
| RCO_O2  | Peroxy Propionyl and higher peroxy acyl Radicals                                                                                                                 |
| PAN2    | PPN and other higher alkyl PAN analogues                                                                                                                         |
| CCHO    | Acetaldehyde                                                                                                                                                     |
| RCO_OOH | Higher organic peroxy acids                                                                                                                                      |
| RCO_OH  | Higher organic acids                                                                                                                                             |
| BZCO_O2 | Peroxyacyl radical formed from Aromatic Aldehydes                                                                                                                |
| PBZN    | PAN analogues formed from Aromatic Aldehydes                                                                                                                     |
| BZ_O    | Phenoxy Radicals                                                                                                                                                 |
| MA_RCO3 | Peroxyacyl radicals formed from methacrolein and other acroleins                                                                                                 |

| Name     | Description                                                                                                                                                         |
|----------|---------------------------------------------------------------------------------------------------------------------------------------------------------------------|
| MA_PAN   | PAN analogue formed from Methacrolein                                                                                                                               |
| TBU_O    | t-Butoxy Radicals                                                                                                                                                   |
| ACET     | Acetone                                                                                                                                                             |
| NPHE     | Nitrophenols                                                                                                                                                        |
| PHEN     | Phenol                                                                                                                                                              |
| BZNO2_O  | Nitro-substituted Phenoxy Radical                                                                                                                                   |
| HOCOO    | Radical formed when Formaldehyde reacts with HO2                                                                                                                    |
| HCOOH    | Formic Acid                                                                                                                                                         |
| RCHO     | Lumped C3+ Aldehydes                                                                                                                                                |
| GLY      | Glyoxal                                                                                                                                                             |
| MGLY     | Methyl Glyoxal                                                                                                                                                      |
| BACL     | Biacetyl                                                                                                                                                            |
| CRES     | Cresols                                                                                                                                                             |
| BALD     | Aromatic aldehydes                                                                                                                                                  |
| METHACRO | Methacrolein                                                                                                                                                        |
| MVK      | Methyl Vinyl Ketone                                                                                                                                                 |
| ISOPROD  | Lumped isoprene product species                                                                                                                                     |
| DCB1     | Reactive Aromatic Fragmentation Products that do not undergo significant photodecomposition to radicals                                                             |
| DCB2     | Reactive Aromatic Fragmentation Products which photolyze with alpha-dicarbonyl-like action spectrum                                                                 |
| DCB3     | Reactive Aromatic Fragmentation Products which photolyze with acrolein action spectrum.                                                                             |
| ETHENE   | Ethene                                                                                                                                                              |
| ISOPRENE | Isoprene                                                                                                                                                            |
| TRP1     | Terpenes                                                                                                                                                            |
| ALK1     | Alkanes and other non-aromatic compounds that react only with OH, and have $k_{OH} < 5 \times 10^2 \text{ ppm}^{-1} \text{ min}^{-1}$                               |
| ALK2     | Alkanes and other non-aromatic compounds that react only with OH, and have $k_{OH}$ between $5 \times 10^2$ and $2.5 \times 10^3 \text{ ppm}^{-1} \text{ min}^{-1}$ |
| ALK3     | Alkanes and other non-aromatic compounds that react only with OH, and have $k_{OH}$ between $2.5 \times 10^3$ and $5 \times 10^3 \text{ ppm}^{-1} \text{ min}^{-1}$ |
| ALK4     | Alkanes and other non-aromatic compounds that react only with OH, and have $k_{OH}$ between $5 \times 10^3$ and $1 \times 10^4 \text{ ppm}^{-1} \text{ min}^{-1}$   |
| ALK5     | Alkanes and other non-aromatic compounds that react only with OH, and have $k_{OH}$ greater than $1 \times 10^4 \text{ ppm}^{-1} \text{ min}^{-1}$                  |
| ARO1     | Aromatics with $k_{OH} < 2 \times 10^4 \text{ ppm}^{-1} \text{ min}^{-1}$                                                                                           |
| ARO2     | Aromatics with $k_{OH} > 2 \times 10^4 \text{ ppm}^{-1} \text{ min}^{-1}$                                                                                           |
| OLE1     | Alkenes (other than ethene) with $k_{OH} < 7 \times 10^4 \text{ ppm}^{-1} \text{ min}^{-1}$                                                                         |
| OLE2     | Alkenes with $k_{OH} > 7 \times 10^4 \text{ ppm}^{-1} \text{ min}^{-1}$                                                                                             |

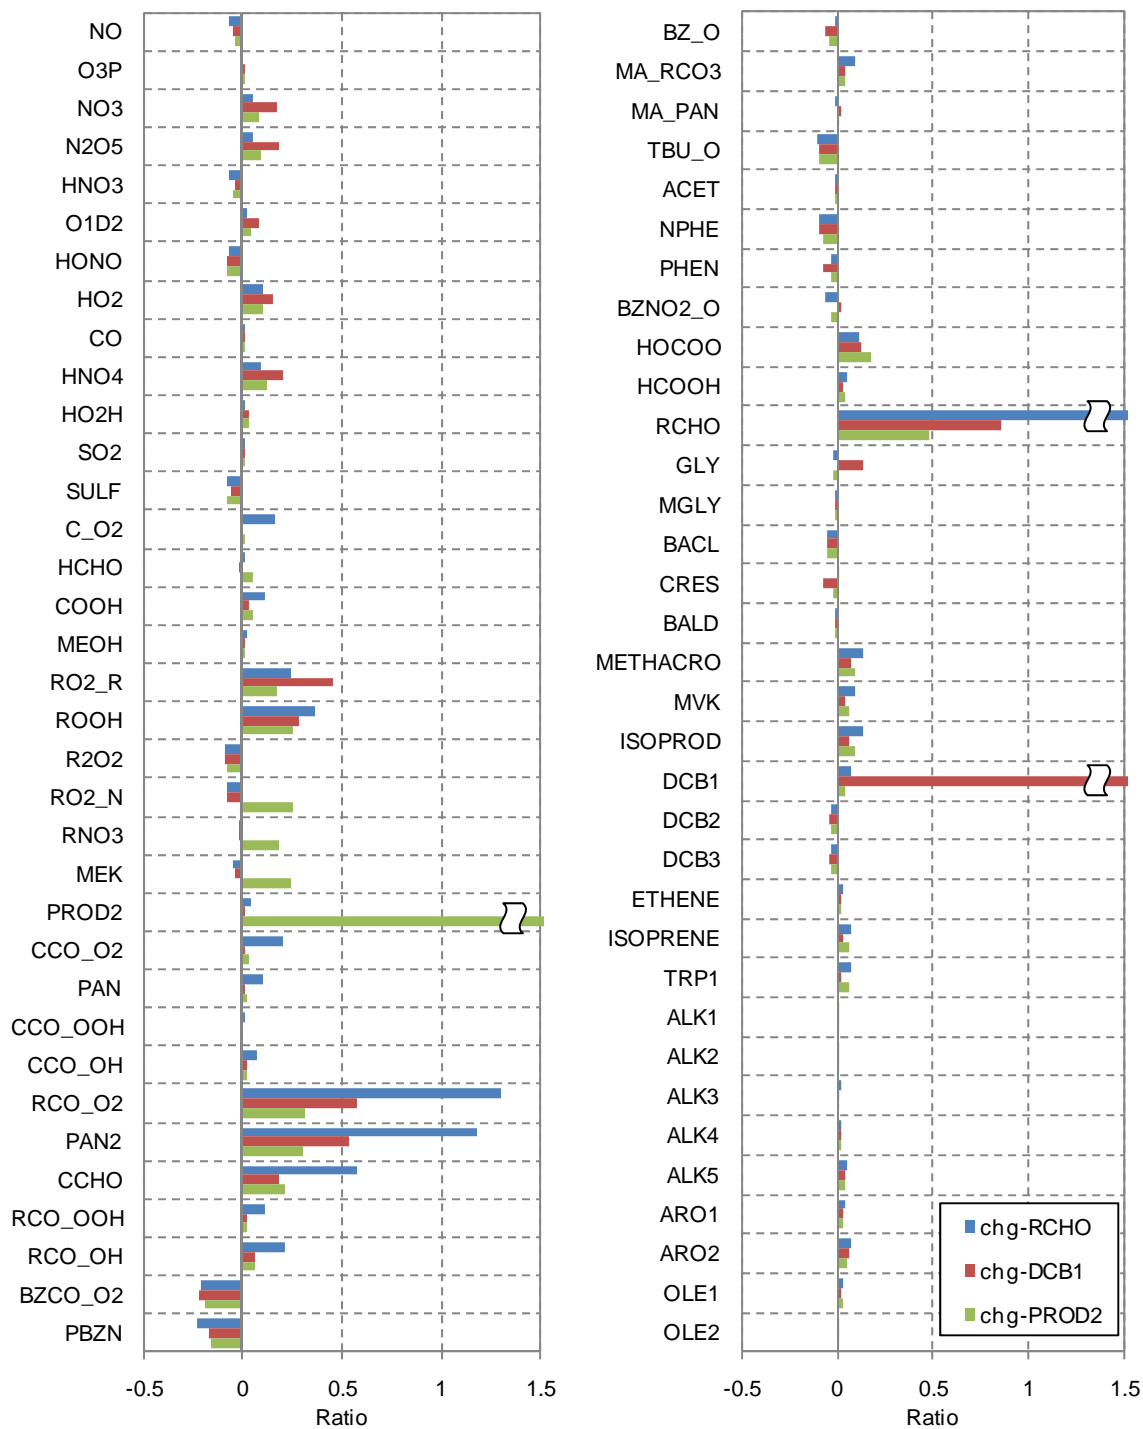

Fig.S1 Incremental ratios of concentrations of species which are not included in Fig. 10 in the chg-RCHO, chg-DCB1 and chg-PROD2 cases compared to those in the base case, which are averaged over the target period.

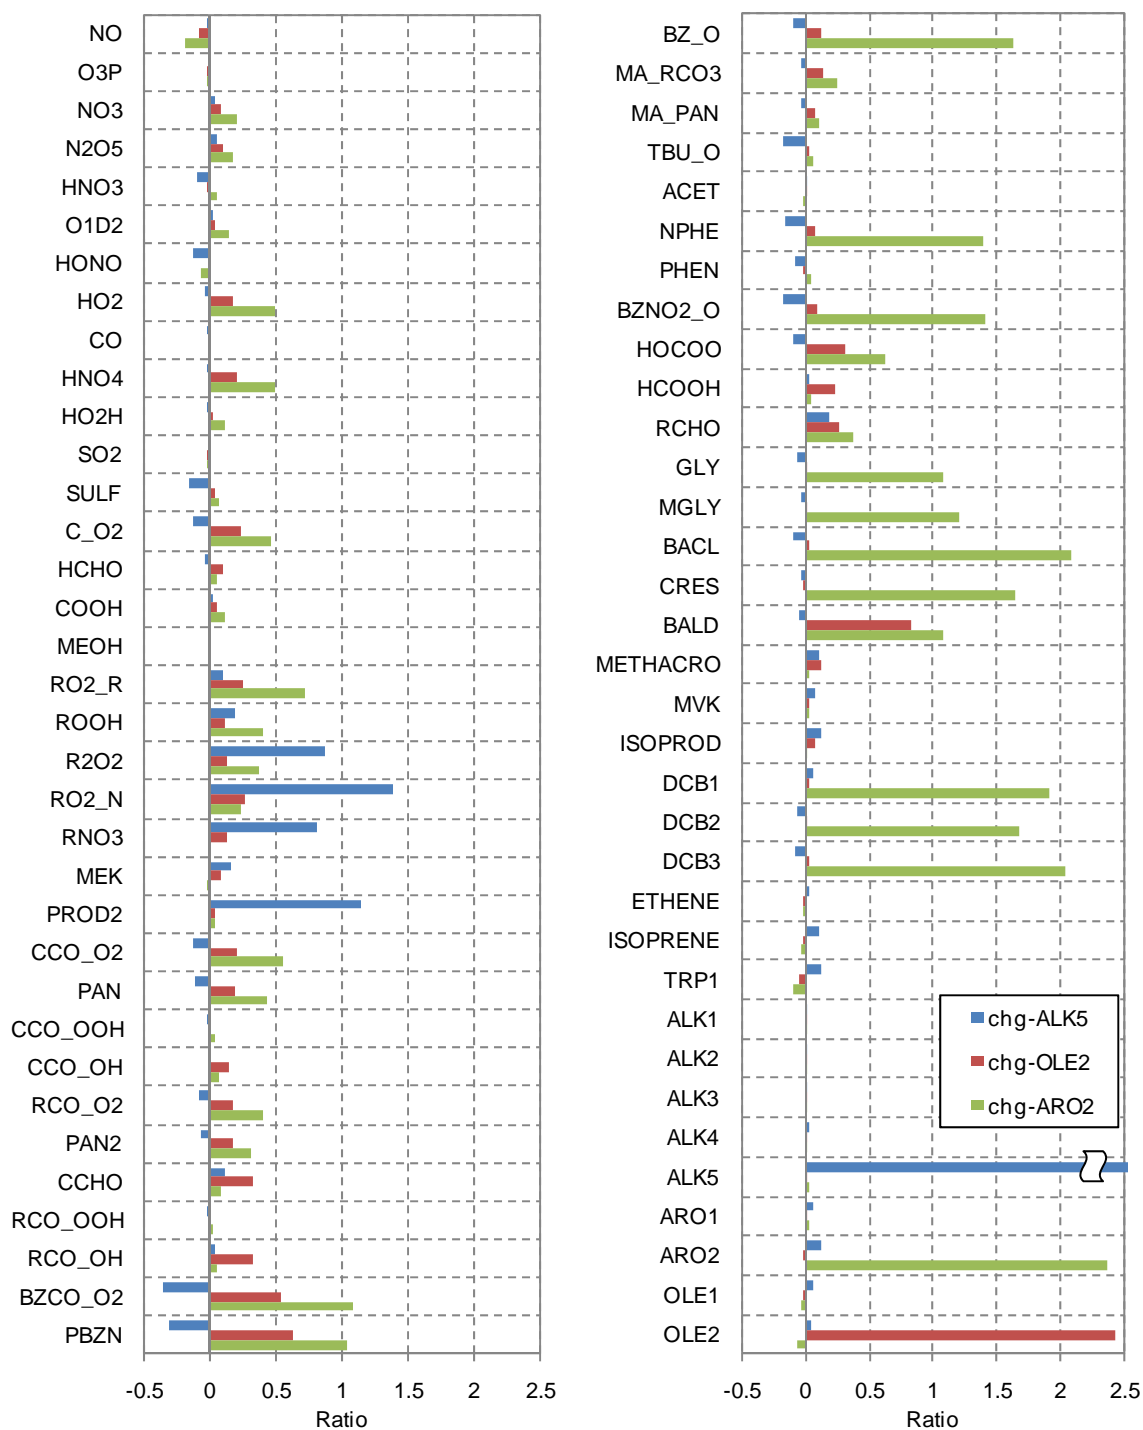

Fig.S2 Incremental ratios of concentrations of species which are not included in Fig. 13 in the chg-ALK5, chg-OLE2 and chg-ARO2 cases compared to those in the base case, which are averaged over the target period.
